# Supplementary material for: Tetraploid cells from cytokinesis failure induce aneuploidy and spontaneous transformation of mouse ovarian surface epithelial cells
Source: PubMed Central journal article supplement — Cell Cycle. 2012 Aug 1;11(15):2864–75. doi: 10.4161/cc.21196 (PMC3419060; doi:10.4161/cc.21196), 2012-08-01
Supplement: cc-11-2864-s01.pdf [file cc-11-2864-s01.pdf]

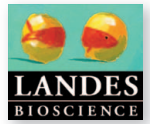

## **Supplemental Material to:**

**Lei Lv, Tianwei Zhang, Qiyi Yi, Yun Huang, Zheng Wang,  
Heli Hou, Huan Zhang, Wei Zhang, Qiaomei Hao, Zongyou  
Guo, Howard J. Cooke and Qinghua Shi**

**Tetraploid cells from cytokinesis failure induce aneuploidy  
and spontaneous transformation of mouse ovarian  
surface epithelial cells**

**2012; 11(15)**

**<http://dx.doi.org/10.4161/cc.21196>**

**<http://www.landesbioscience.com/journals/cc/article/21196>**

### Percentage of cytokinesis failure in bipolar divisions

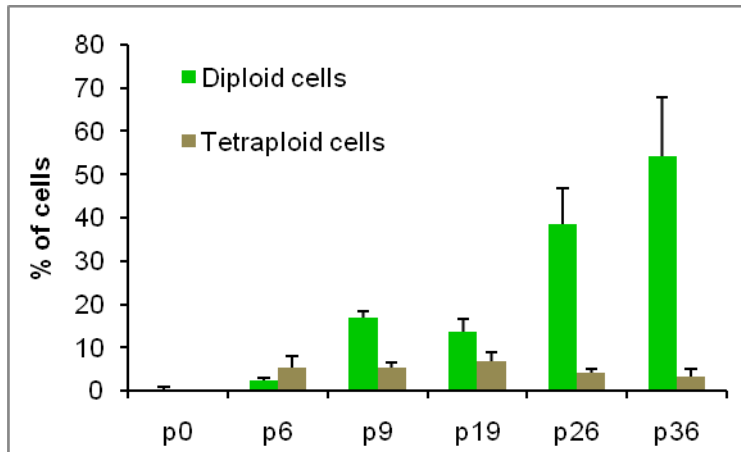

**Supplemental Figure 1.** The frequency of cytokinesis failure in bipolar divisions of diploid and tetraploid cells at different passages. The percentage of cytokinesis failure in cells at a certain passage was calculated as  $n / (n + 0.5m)$ , for diploid cells:  $n$  is the number of binucleated tetraploid cells and  $m$  is the number of mononucleated cells; for tetraploid cells:  $n$  is the number of binucleated octoploid cells and  $m$  is the number of mononucleated tetraploid cells. Mean  $\pm$  SD, from 3 independent experiments.

### Percentage of bipolar divisions showing chromosome mis-segregation

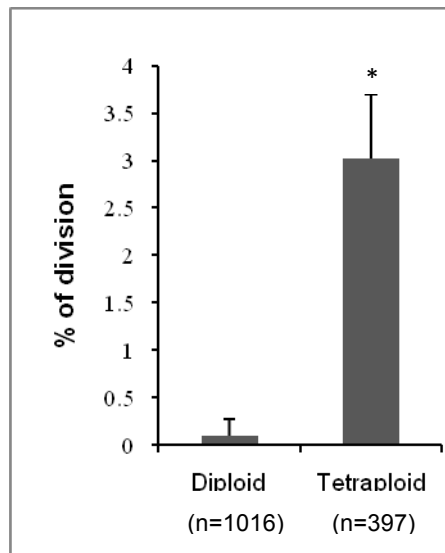

**Supplemental Figure 2.** Tetraploid MOSECs show higher frequency of chromosome mis-segregation than diploid ones during bipolar mitosis. Comparison of the mis-segregation frequency of chromosome 2 and X per division between diploid and tetraploid cells. \*  $P < 0.001$ , from  $2 \times 2$   $\chi^2$  test.  $n$ , the number of divisions analyzed in live-cell imaging followed by FISH. Mean  $\pm$  SD, from 2 independent experiments.

**Supplementary Table 1.** Comparison of tumorigenicity between early and late passage

MOSECs

| Group        | No. of mice<br>injected | Time at necropsy<br>(months after injection) | Tumor<br>formation | Ascites<br>formation |
|--------------|-------------------------|----------------------------------------------|--------------------|----------------------|
| PBS          | 5                       | 2                                            | 0/5                | 0/5                  |
|              | 5                       | 4                                            | 0/5                | 0/5                  |
| MOSECs (p9)  | 4                       | 2                                            | 0/4                | 0/4                  |
|              | 4                       | 4                                            | 0/4                | 0/4                  |
| MOSECs (p37) | 3                       | 2                                            | 3/3                | 0/3                  |
|              | 4                       | 4                                            | 4/4                | 3/4                  |
